# Supplementary material for: Direct transformation of amides: a one-pot reductive Ugi-type three-component reaction of secondary amides
Source: Royal Society of Chemistry journal article supplement (doi:10.1039/c5qo00146c), 2015-01-01

**Electronic Supplementary Information**

**Direct Transformation of Amides: One-pot Reductive Ugi-Type Three-  
component Reaction of Secondary Amides**

*Department of Chemistry, Fujian Provincial Key Laboratory for Chemical Biology,  
iChEM (Collaborative Innovation Centre of Chemistry for Energy Materials),  
College of Chemistry and Chemical Engineering, Xiamen University, Xiamen, Fujian  
361005, P. R. China*

e-mail: [pqhuang@xmu.edu.cn](mailto:pqhuang@xmu.edu.cn); [zjf485@xmu.edu.cn](mailto:zjf485@xmu.edu.cn)

**Contents (19 pages):**

- $^1\text{H}$  NMR and  $^{13}\text{C}$  NMR spectra of the products **2a–2s** S2- S20

$^1\text{H}$  NMR and  $^{13}\text{C}$  NMR spectra of compound **2a**

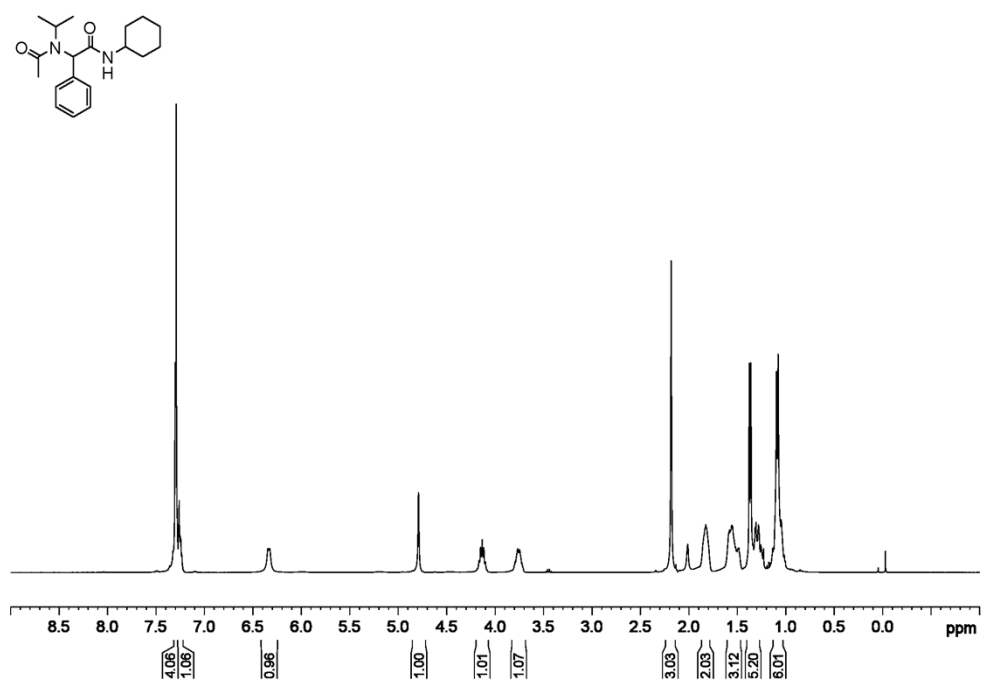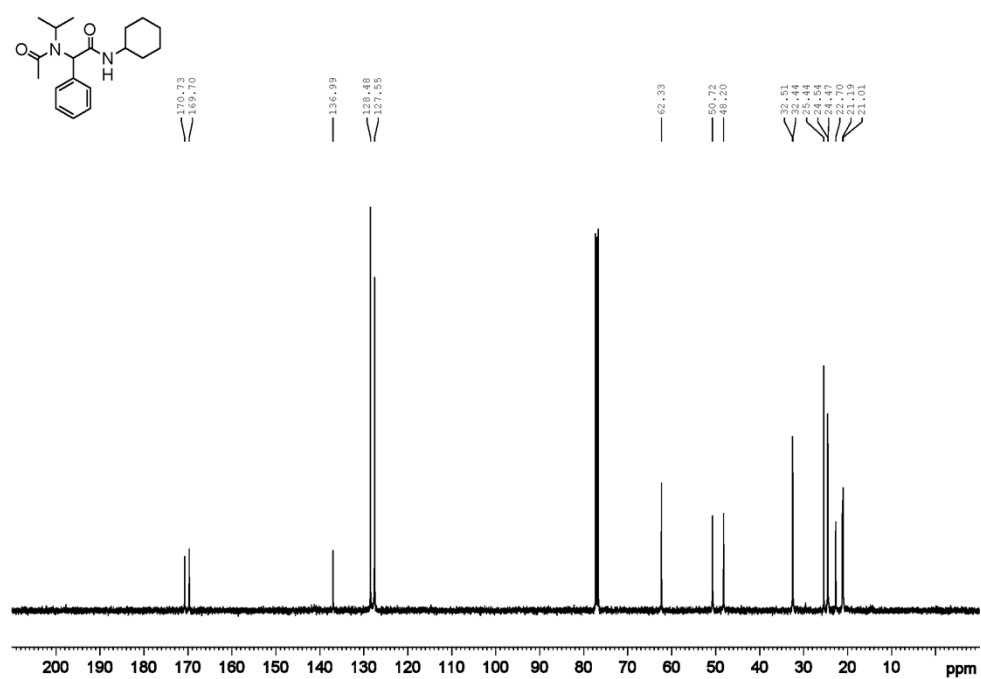

$^1\text{H}$  NMR and  $^{13}\text{C}$  NMR spectra of compound **2b**

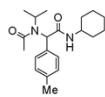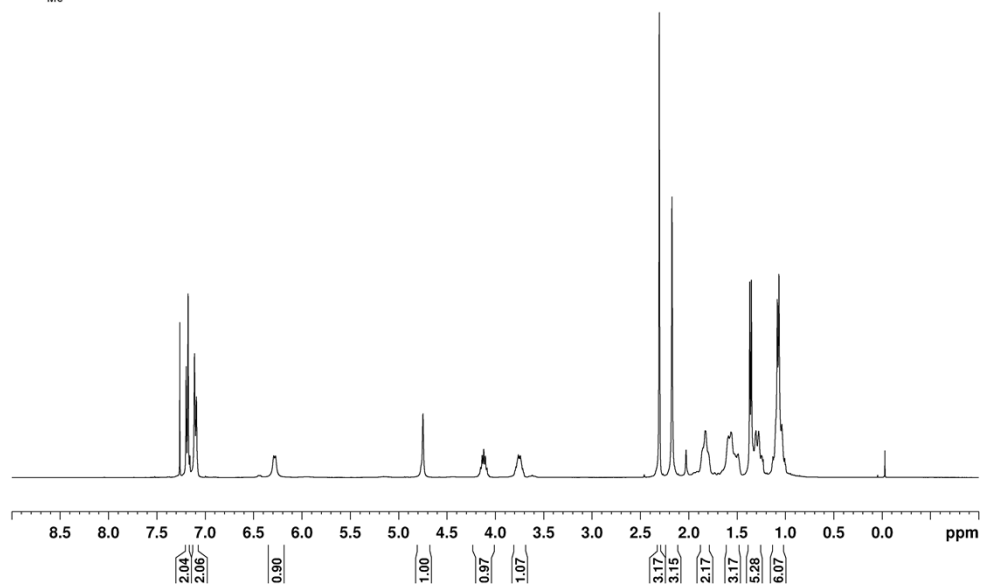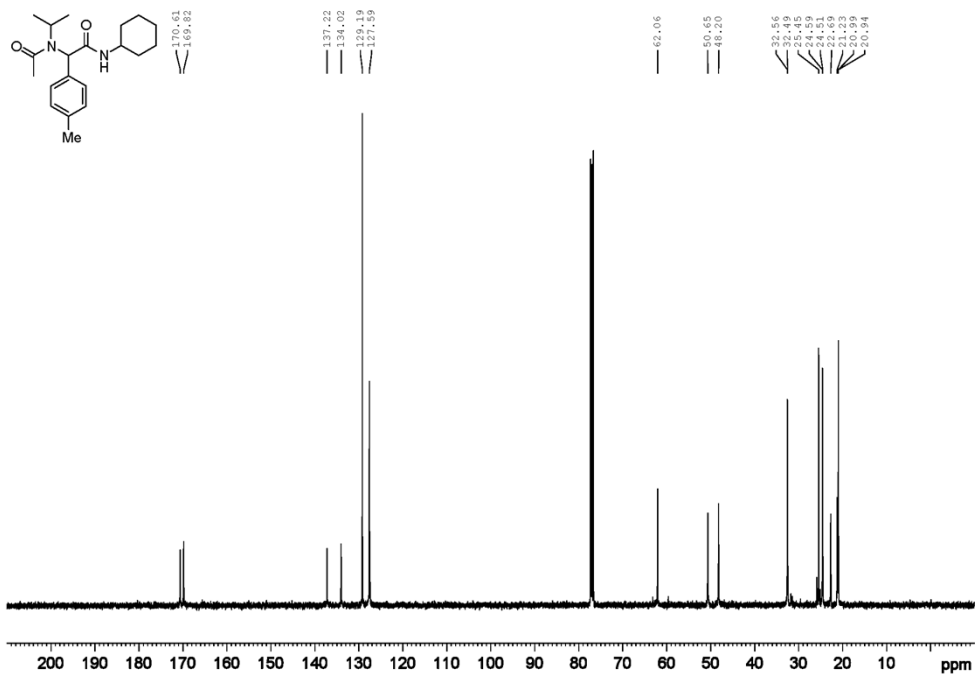

$^1\text{H}$  NMR and  $^{13}\text{C}$  NMR spectra of compound **2c**

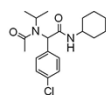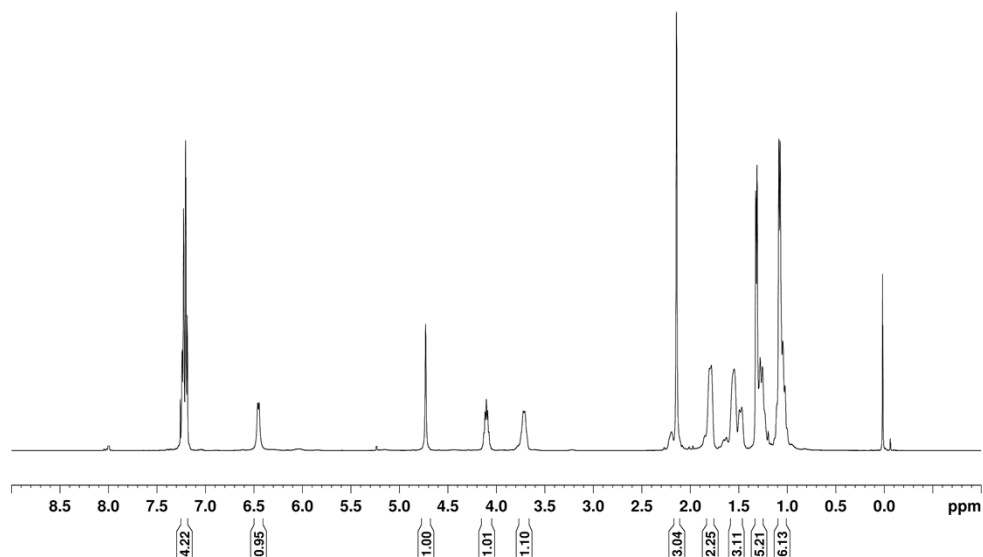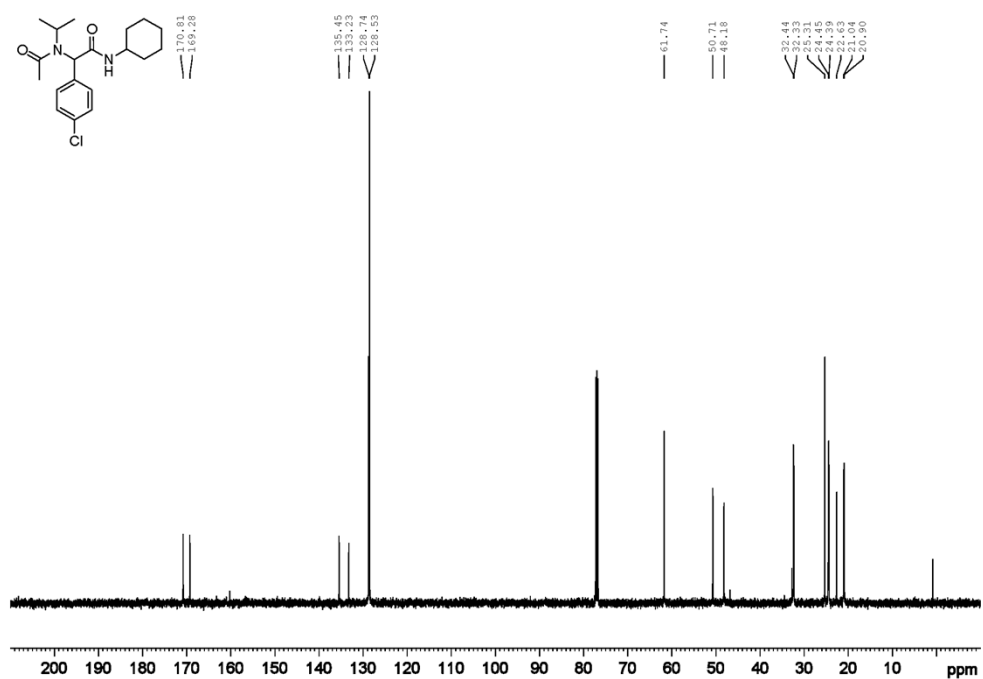

$^1\text{H}$  NMR and  $^{13}\text{C}$  NMR spectra of compound **2d**

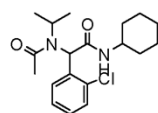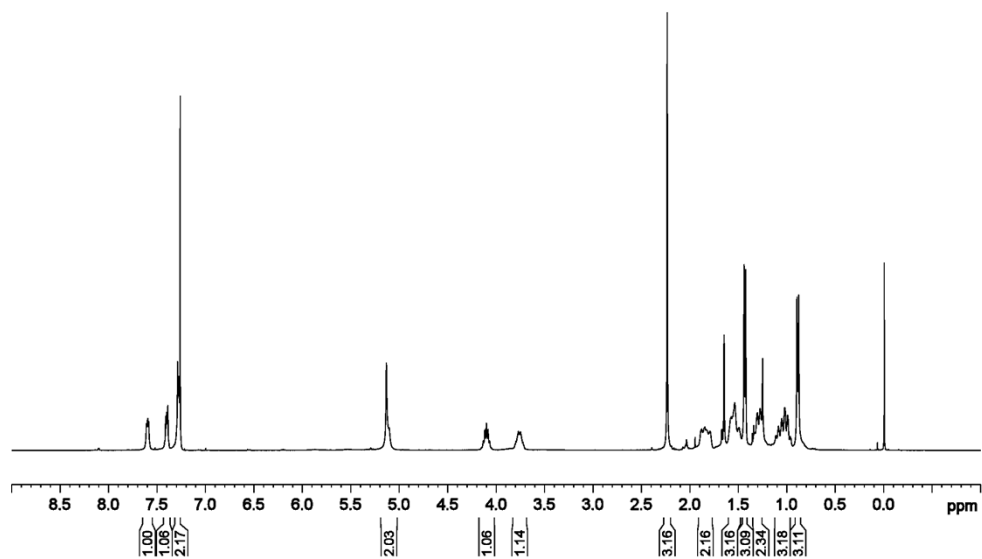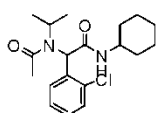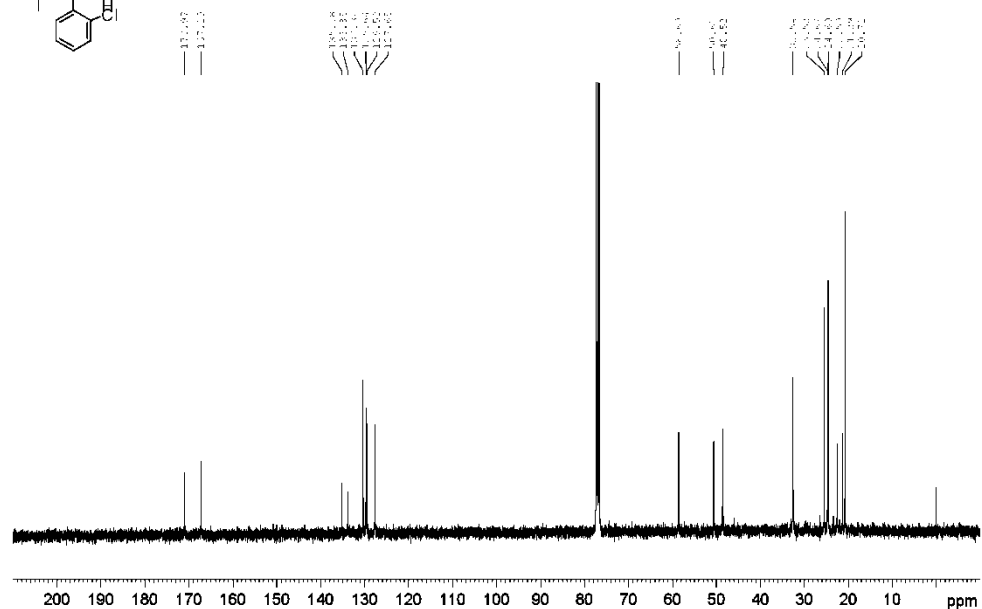

$^1\text{H}$  NMR and  $^{13}\text{C}$  NMR spectra of compound **2e**

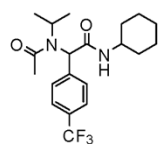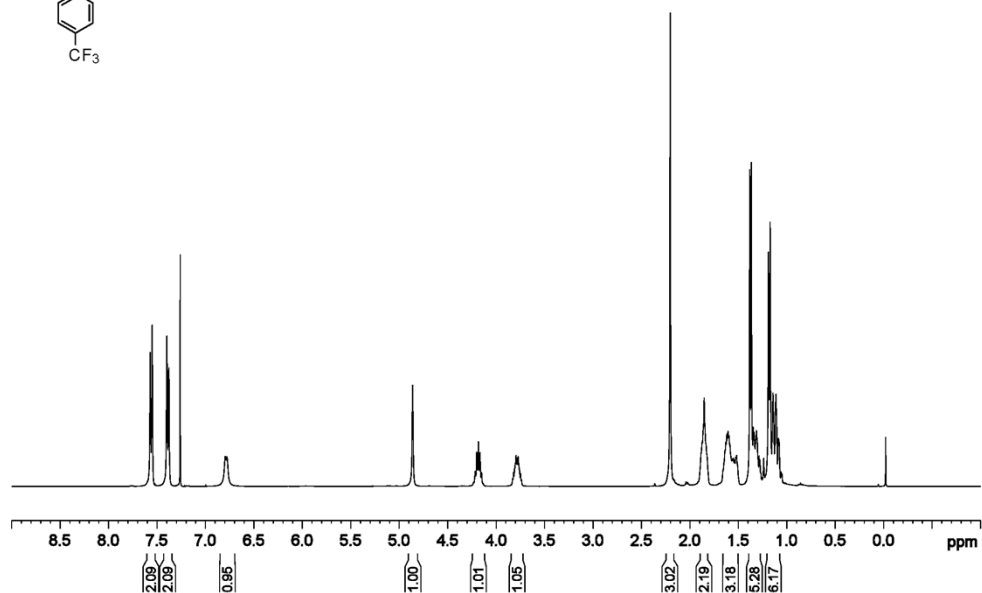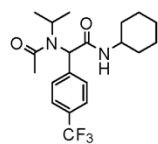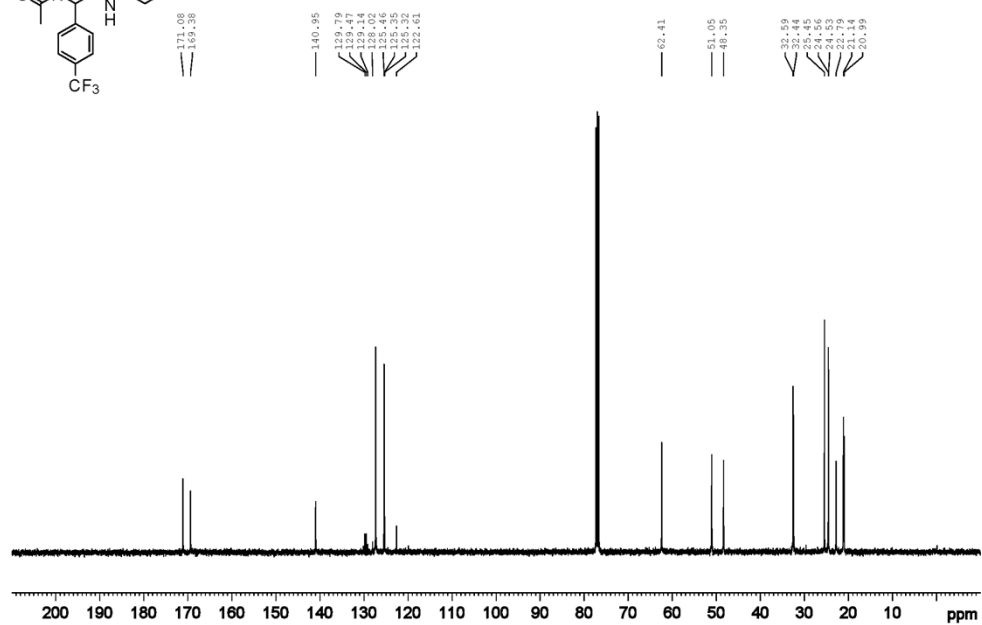

$^1\text{H}$  NMR and  $^{13}\text{C}$  NMR spectra of compound **2f**

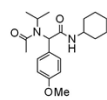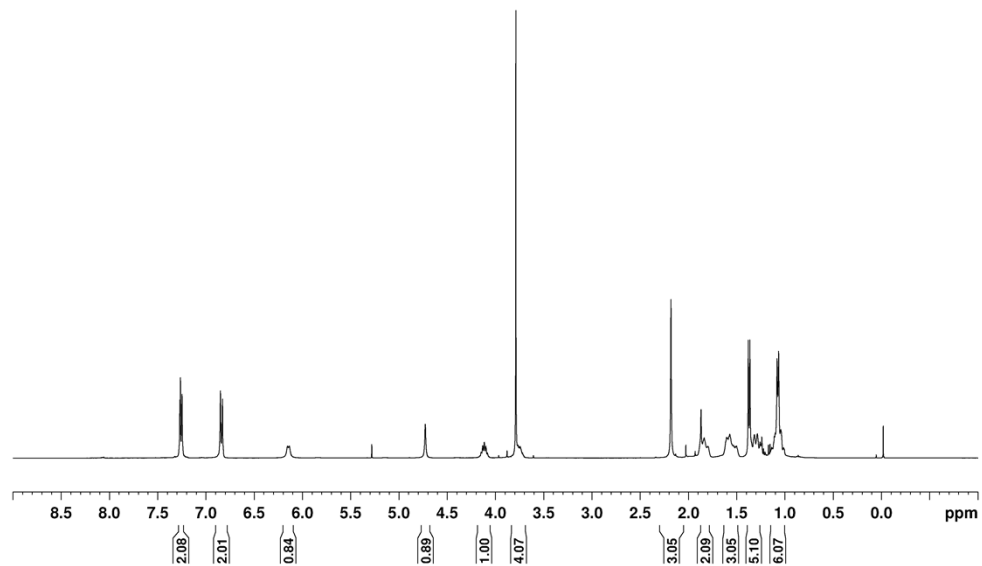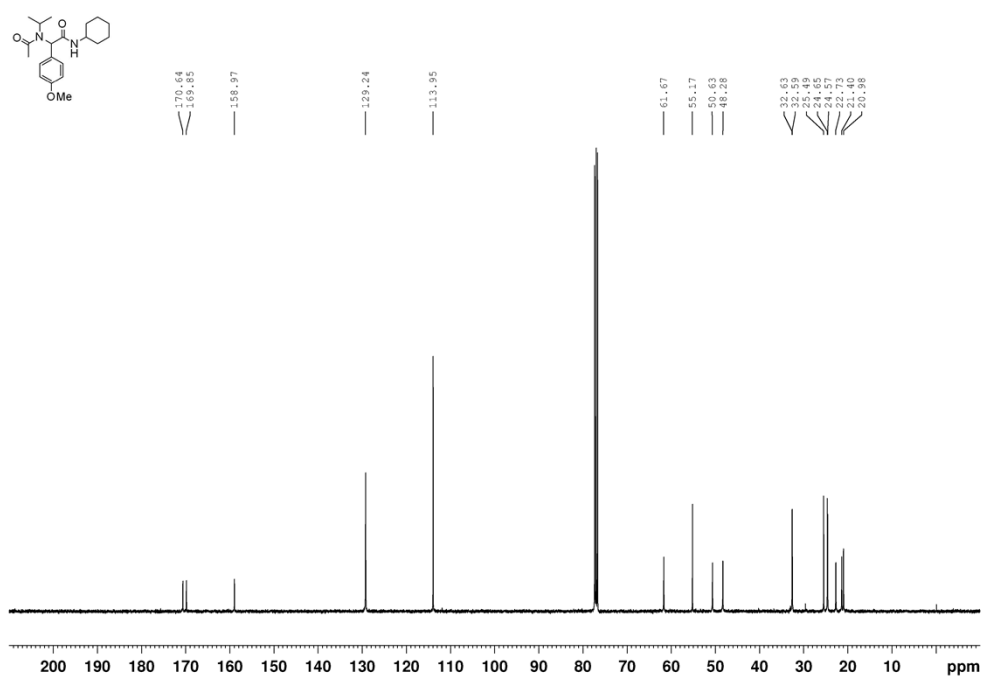

<sup>1</sup>H NMR and <sup>13</sup>C NMR spectra of compound **2g**

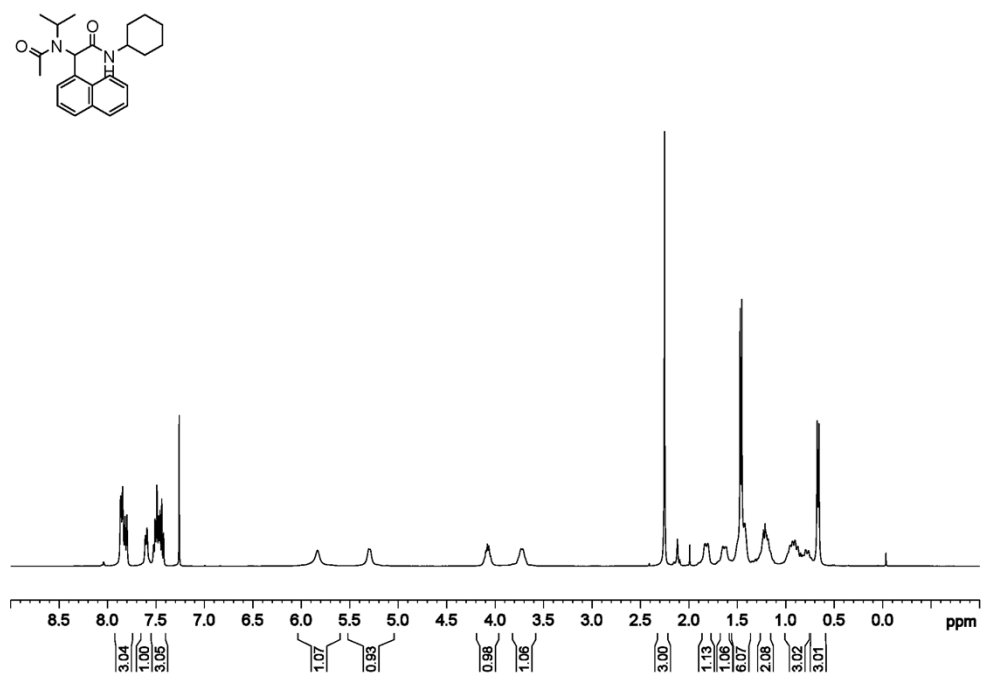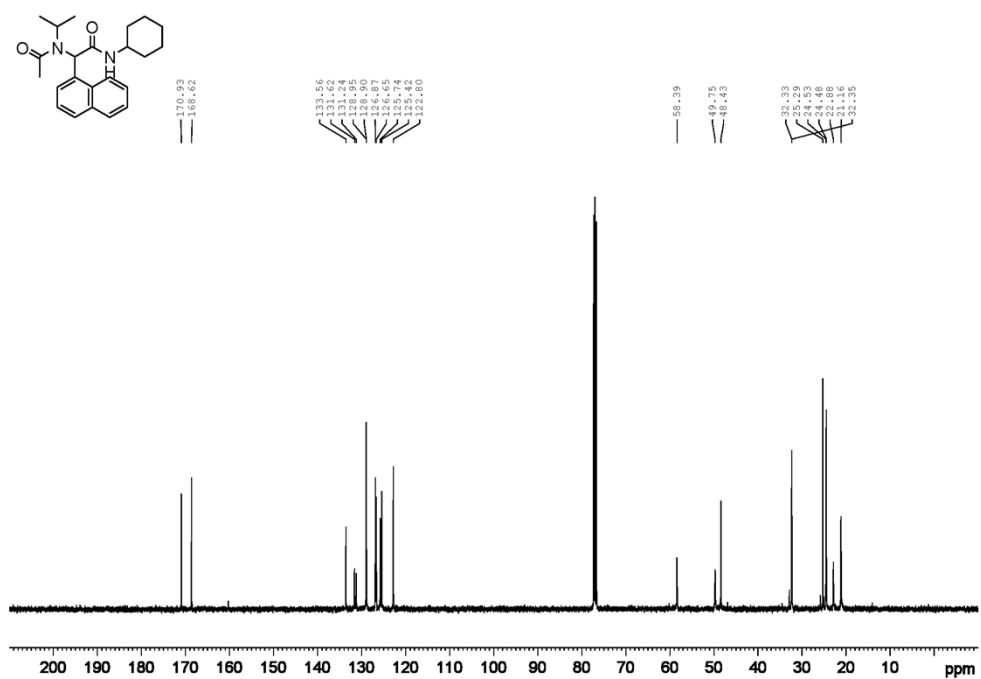



$^1\text{H}$  NMR and  $^{13}\text{C}$  NMR spectra of compound **2h**

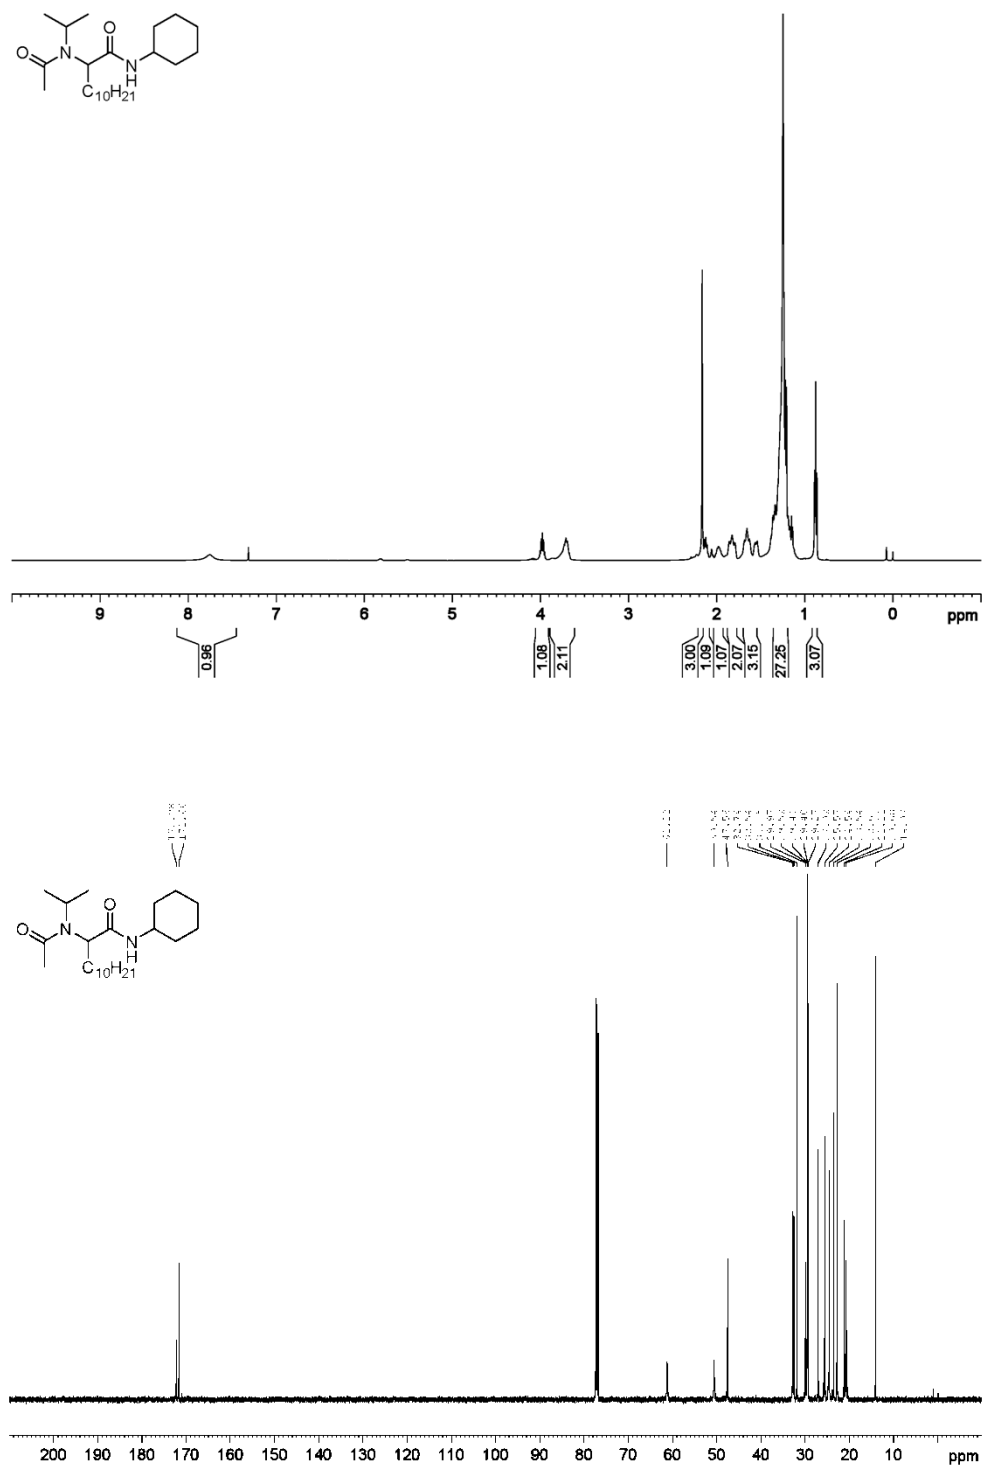

<sup>1</sup>H NMR and <sup>13</sup>C NMR spectra of compound **2i**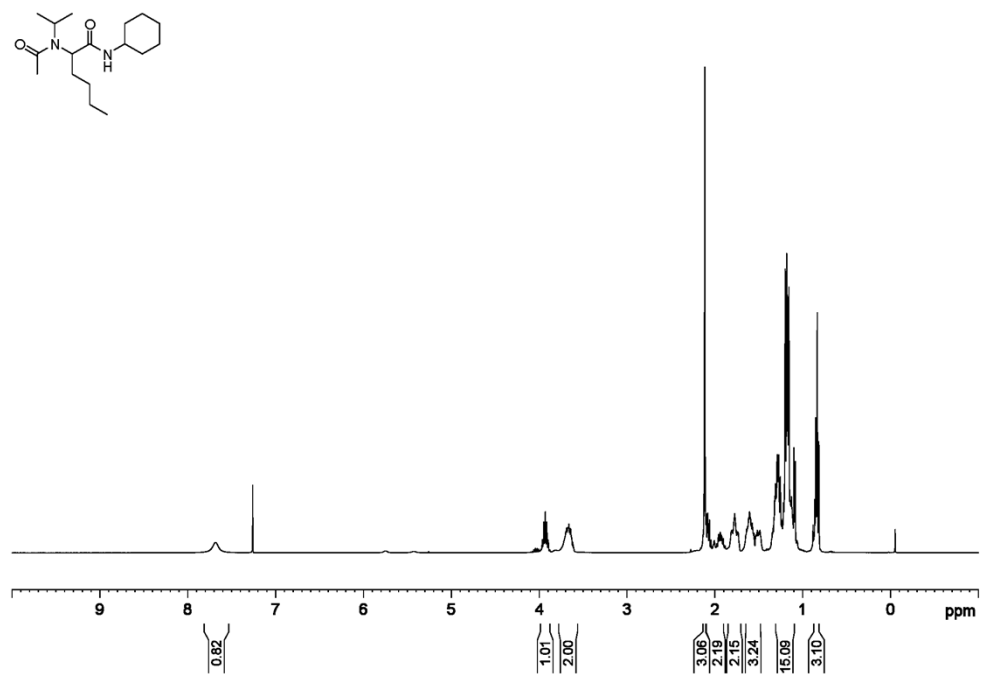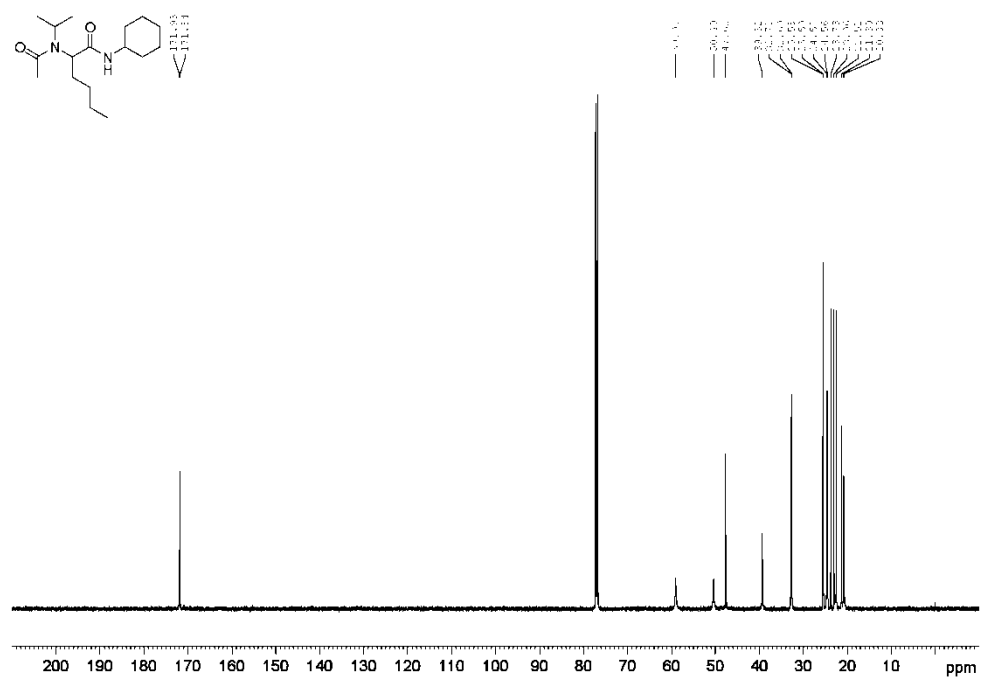

$^1\text{H}$  NMR and  $^{13}\text{C}$  NMR spectra of compound **2j**

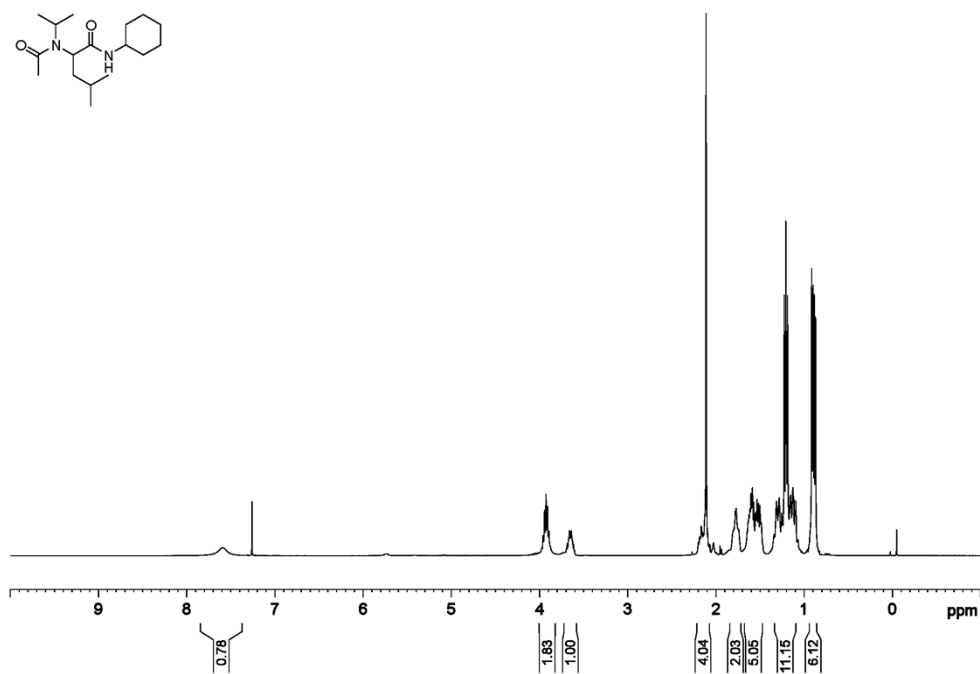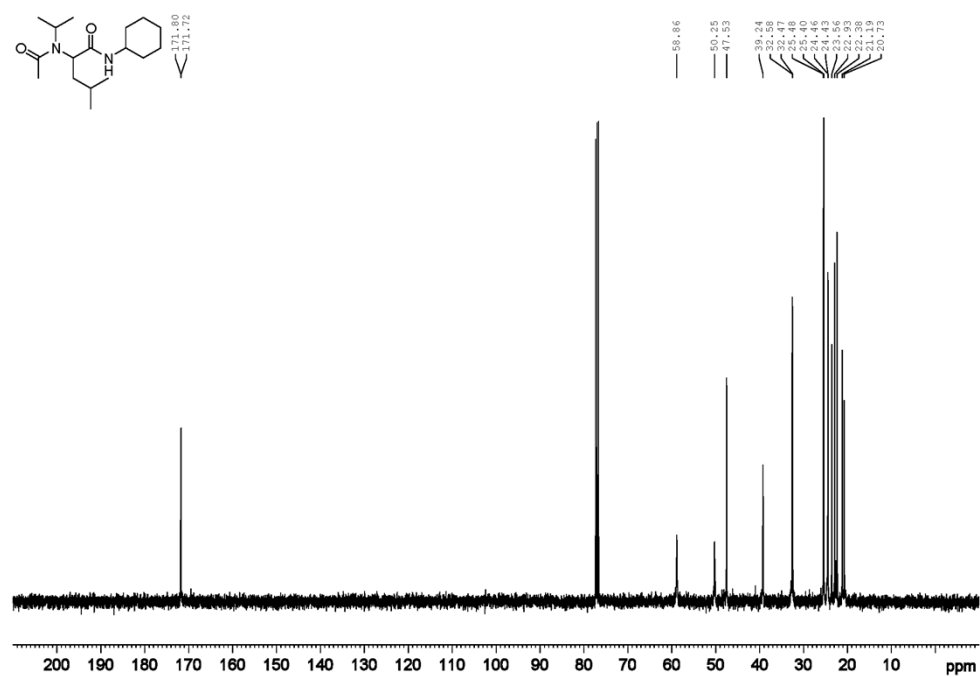

$^1\text{H}$  NMR and  $^{13}\text{C}$  NMR spectra of compound **2k**

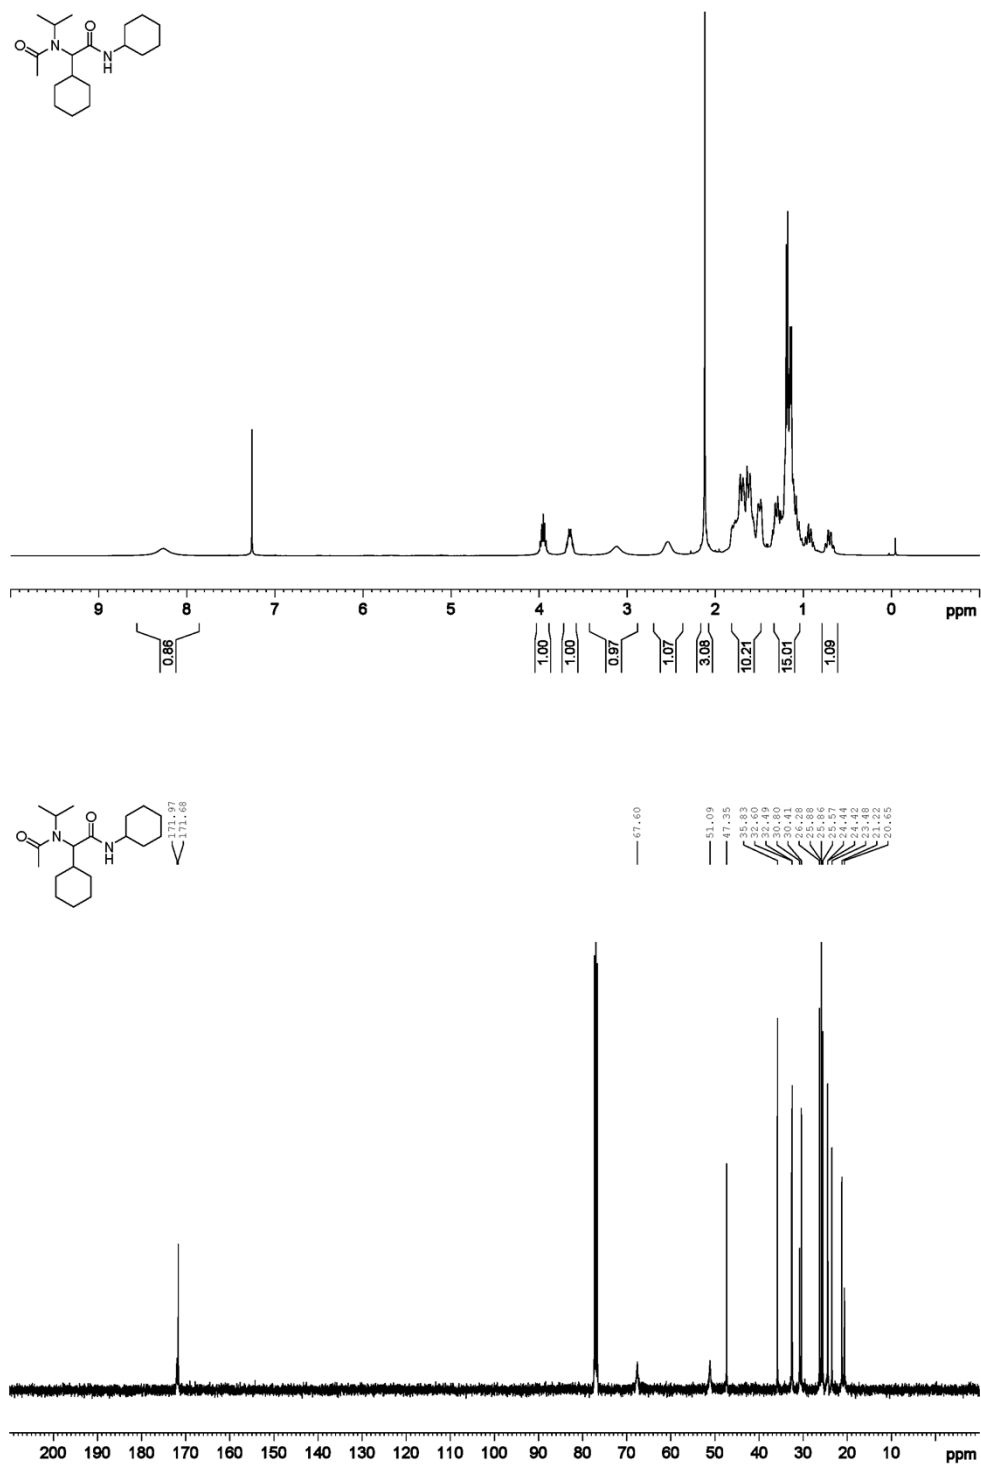

$^1\text{H}$  NMR and  $^{13}\text{C}$  NMR spectra of compound **2I**

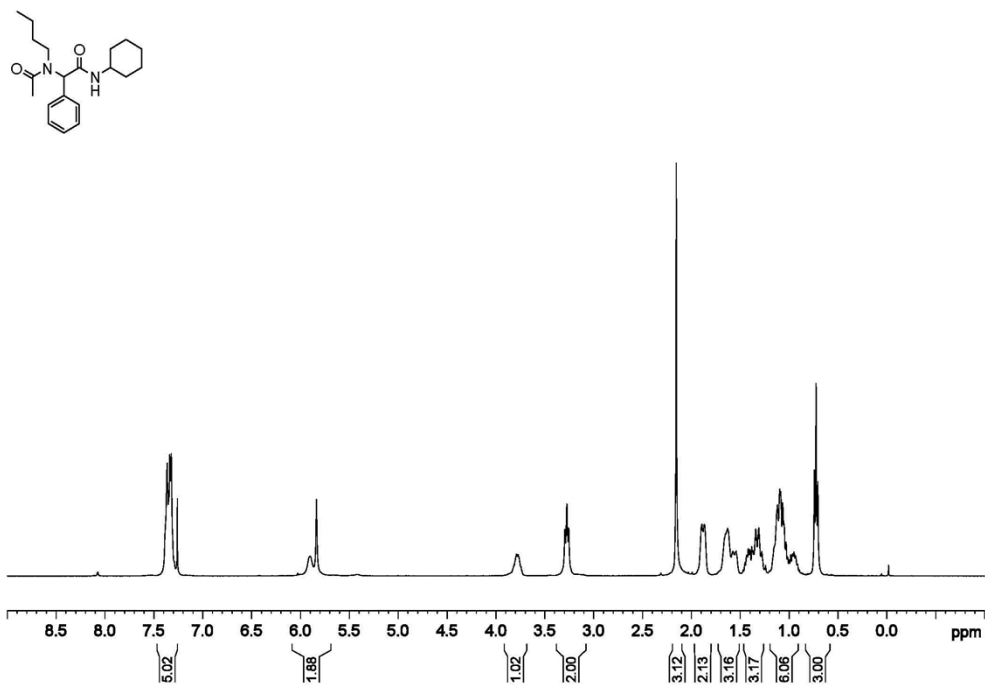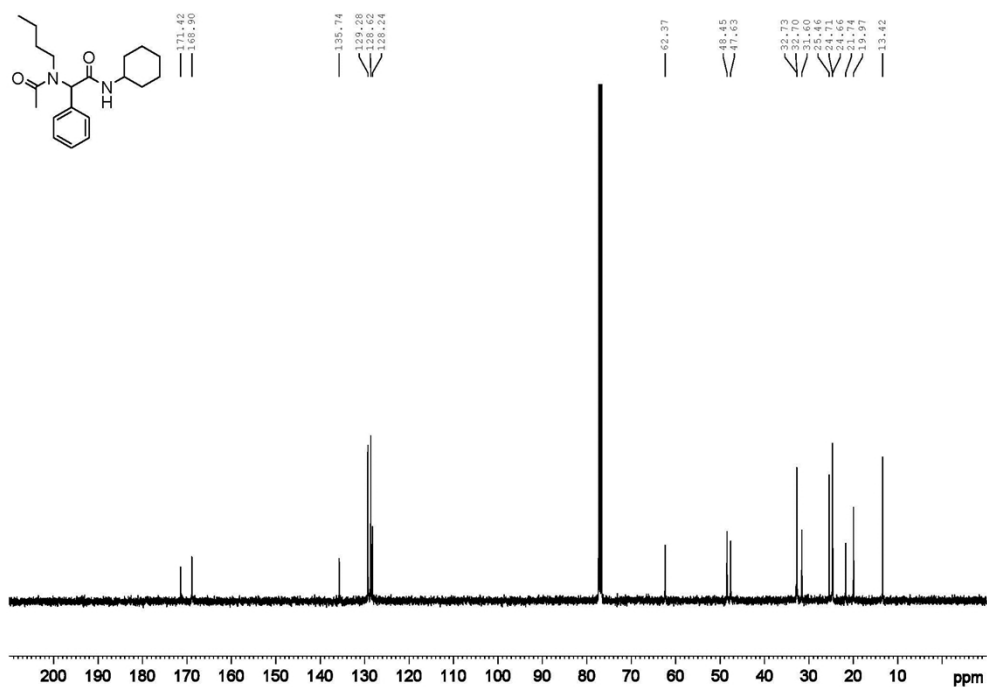

$^1\text{H}$  NMR and  $^{13}\text{C}$  NMR spectra of compound **2m**

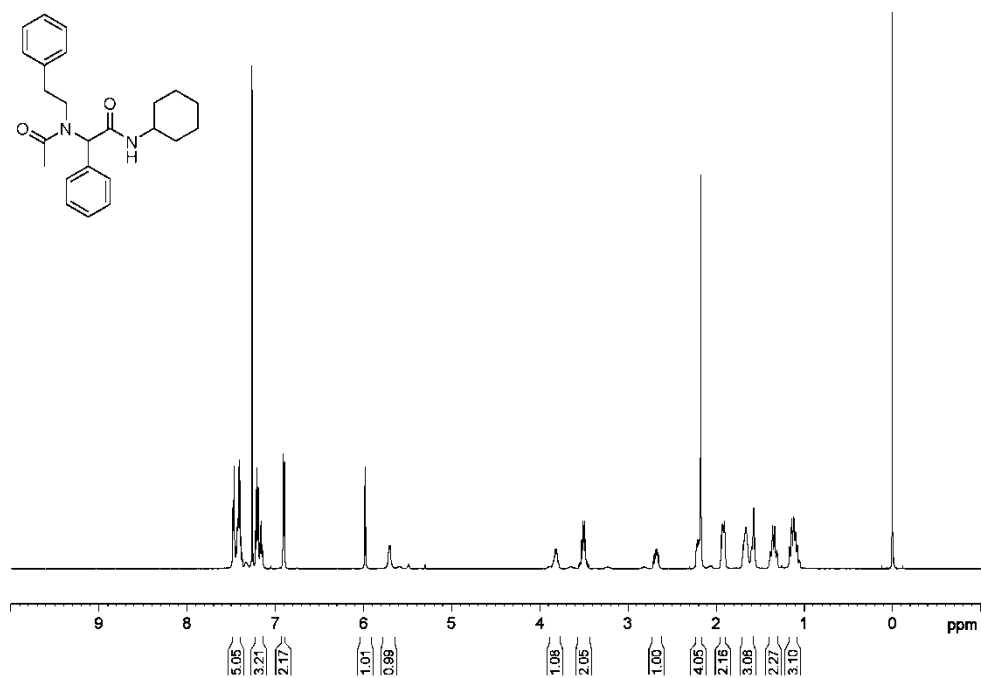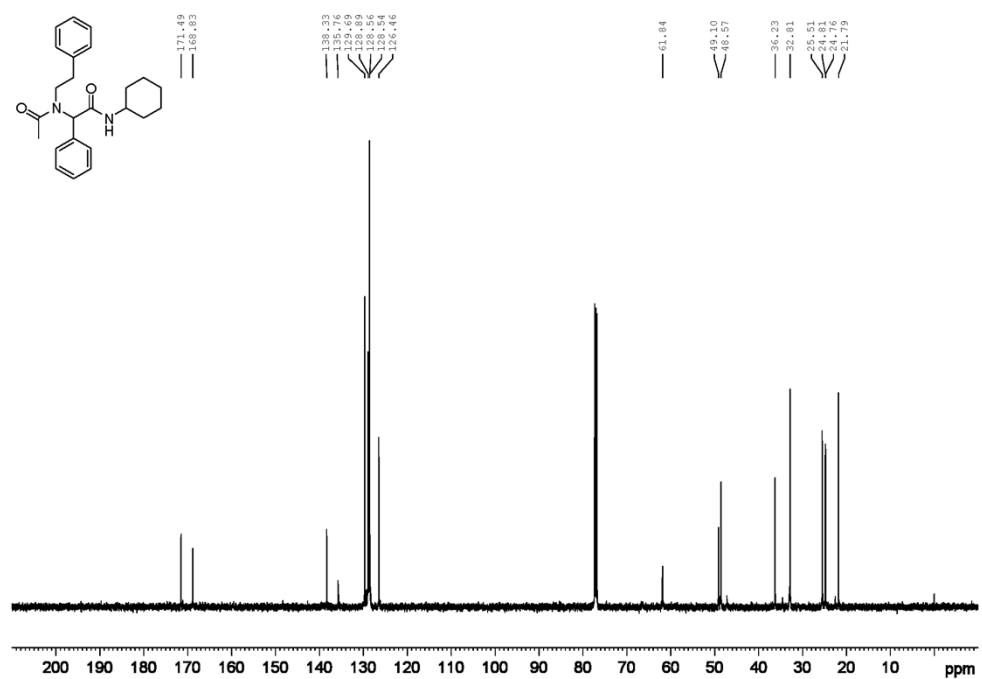

$^1\text{H}$  NMR and  $^{13}\text{C}$  NMR spectra of compound **2n**

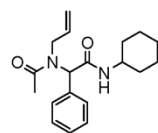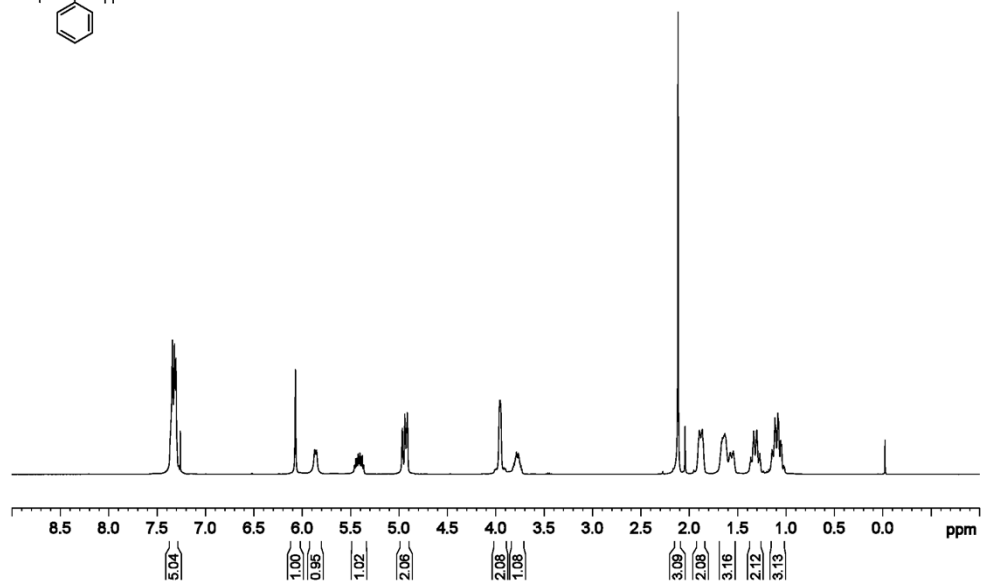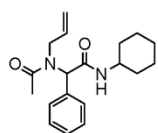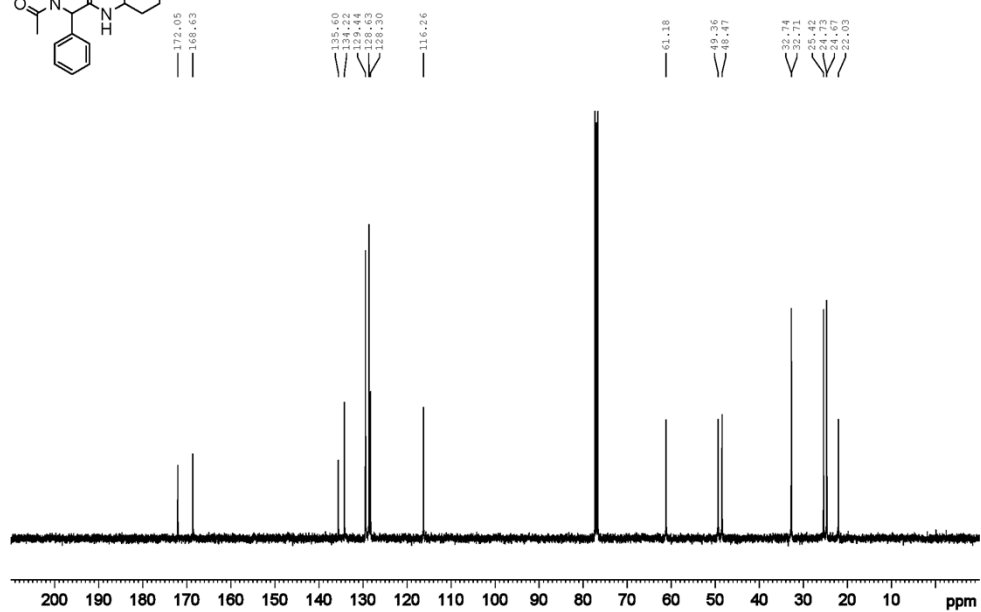

$^1\text{H}$  NMR and  $^{13}\text{C}$  NMR spectra of compound **2o**

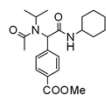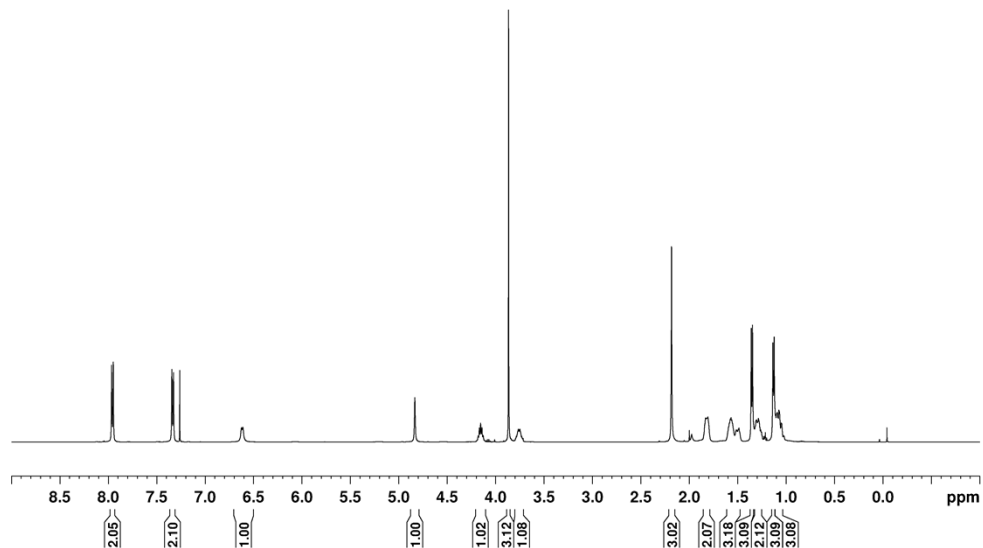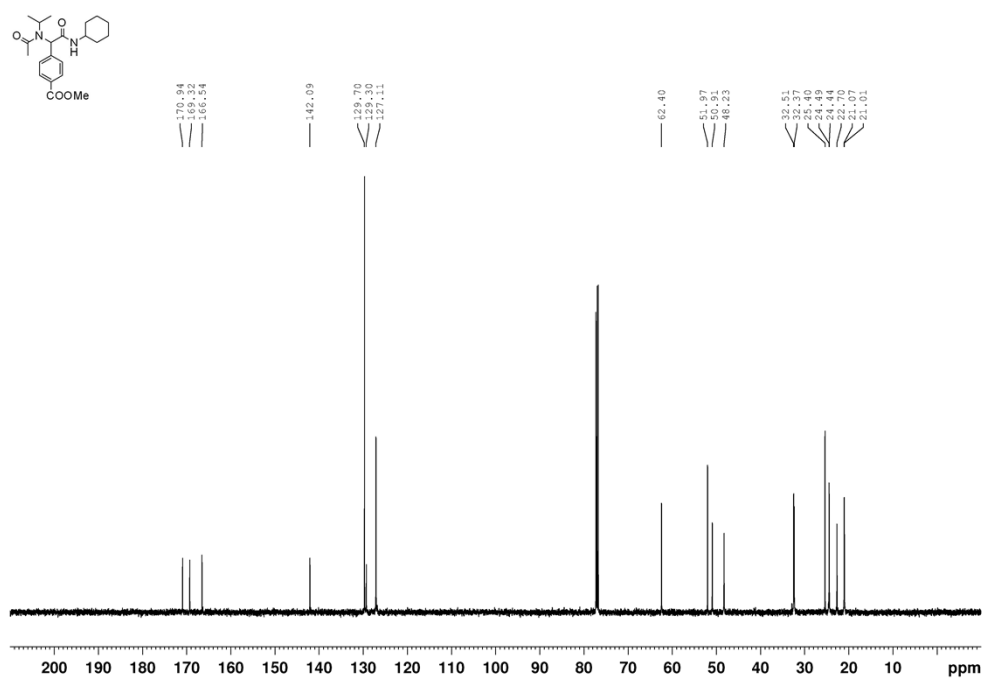



$^1\text{H}$  NMR and  $^{13}\text{C}$  NMR spectra of compound **2p**

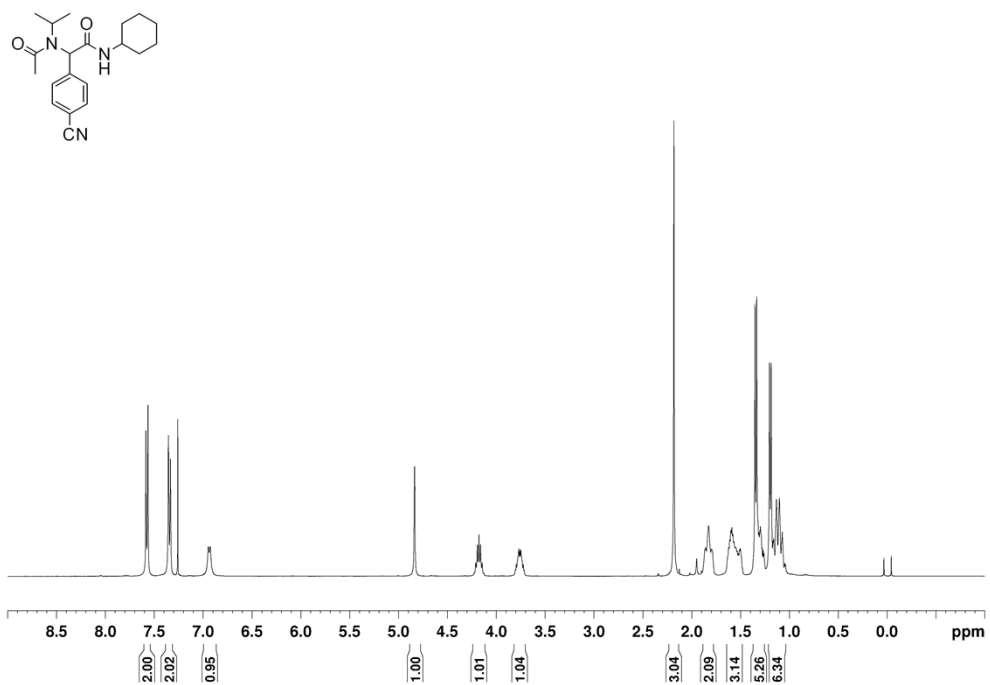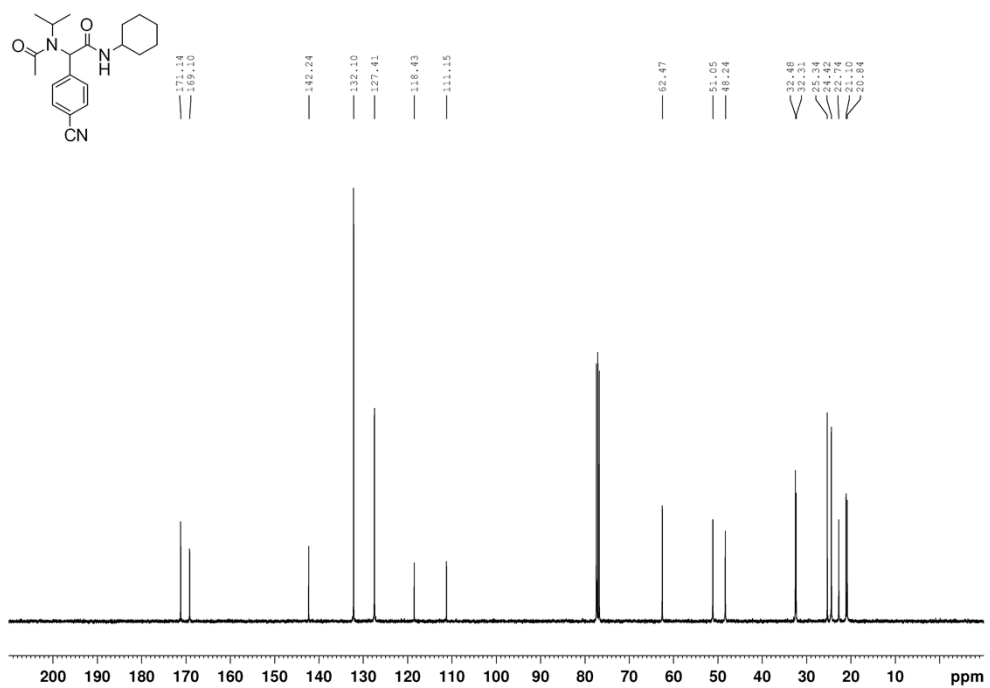

$^1\text{H}$  NMR and  $^{13}\text{C}$  NMR spectra of compound **2q**

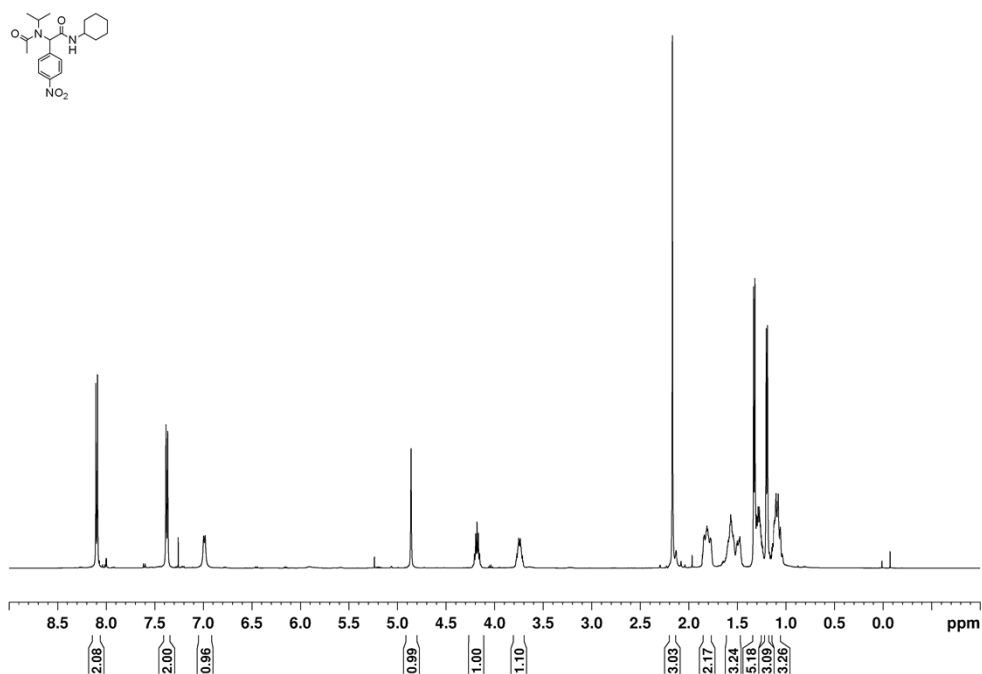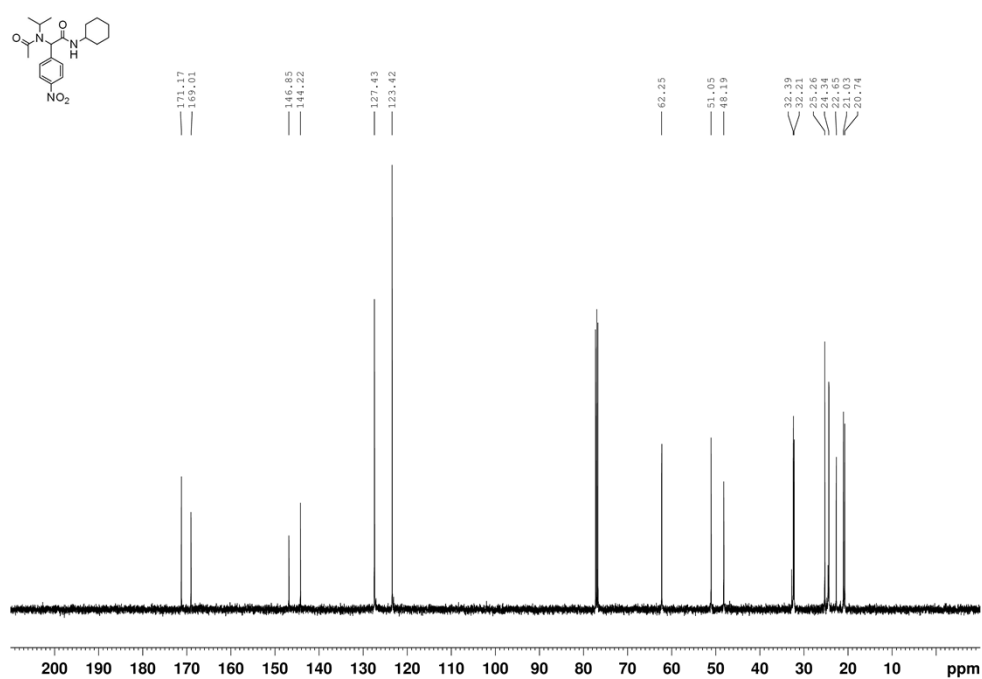

$^1\text{H}$  NMR and  $^{13}\text{C}$  NMR spectra of compound **2r**

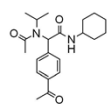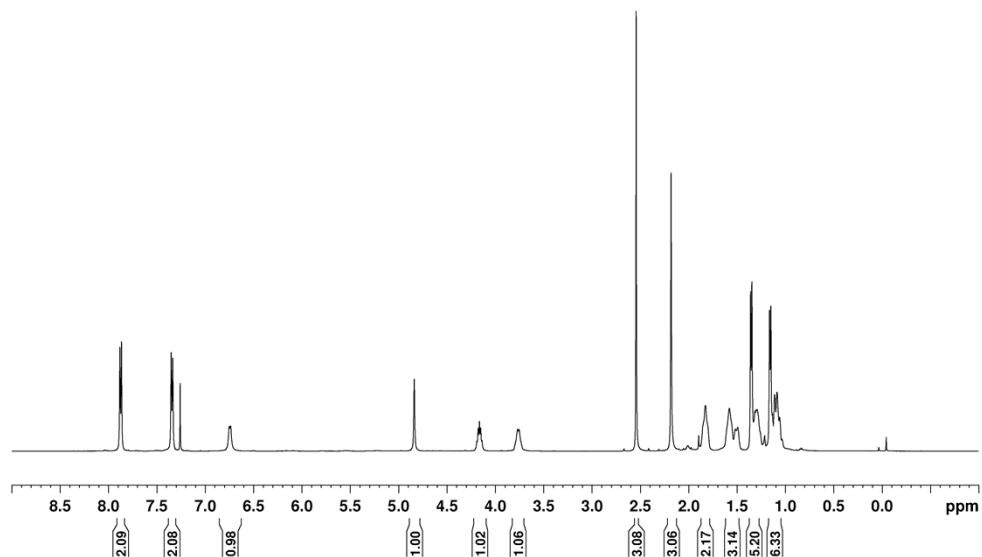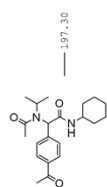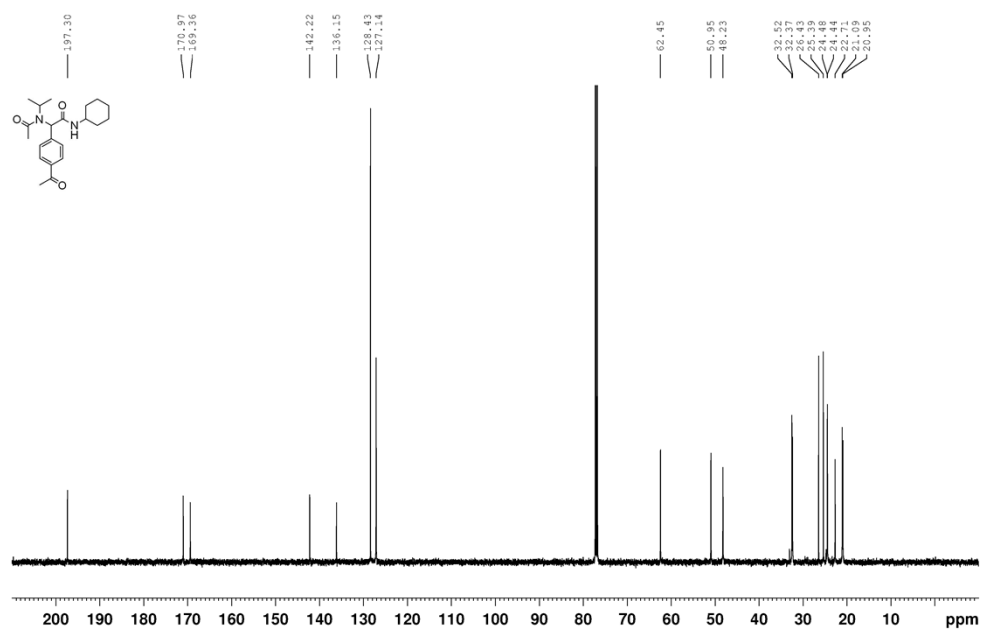

$^1\text{H}$  NMR and  $^{13}\text{C}$  NMR spectra of compound **2s**

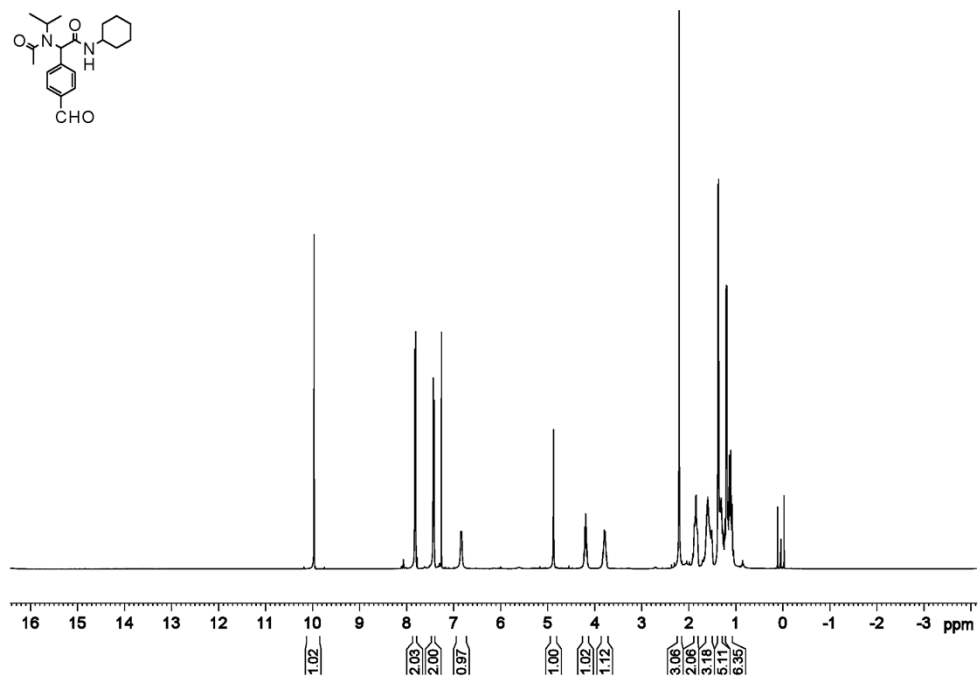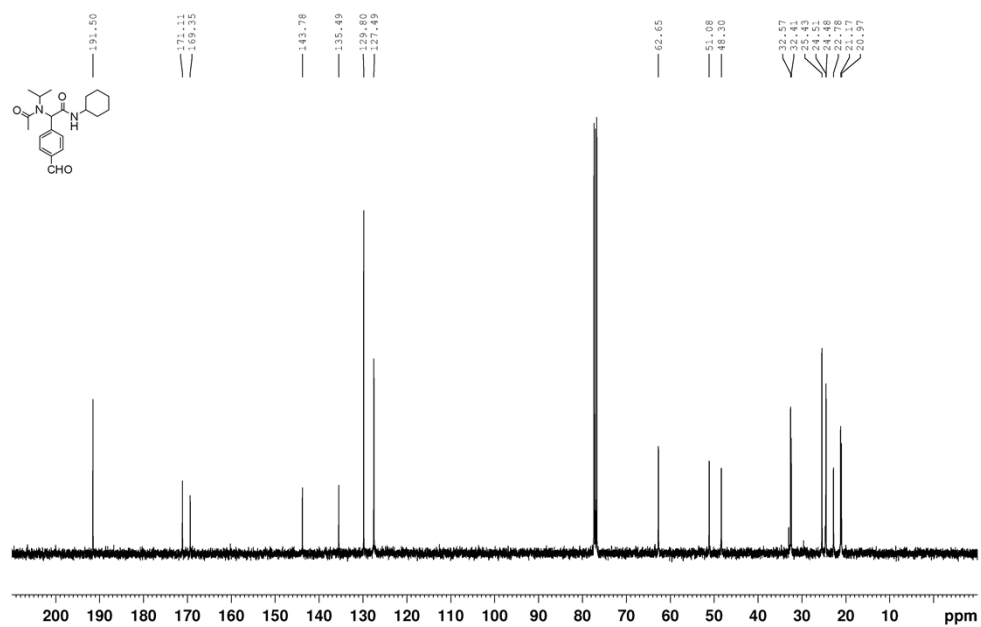

Supplement: c5qo00146c1.pdf [file c5qo00146c1.pdf]
